# Supplementary material for: Applications of a new type of poly(methyl methacrylate)/TiO2 nanocomposite as an antibacterial agent and a reducing photocatalyst
Source: Royal Society of Chemistry journal article supplement (doi:10.1039/c5pp00065c), 2015-06-10
Supplement: c5pp00065c1.pdf [file c5pp00065c1.pdf]

**Electronic Supplementary Material (ESI) for Analyst.**  
**This journal is Photochemistry and Photobiological Science 2015**

**Supplemental Information**

**Applications of a new type of poly(methyl methacrylate)/TiO<sub>2</sub> photocatalyst as an  
antibacterial agent for *Escherichia coli* and reducing agent for 4-nitrophenol**

**Alireza Salabat<sup>\*</sup>, Farid Mirhoseini**

*Department of Chemistry, Faculty of Science, Arak University, 38156-8-8349, Arak, Iran*

*\* Correspondence to: A. Salabat, TEL: +98-86-34173400; Fax: +98-86-34173406;*

*E-mail address: [A-Salabat@araku.ac.ir](mailto:A-Salabat@araku.ac.ir)*

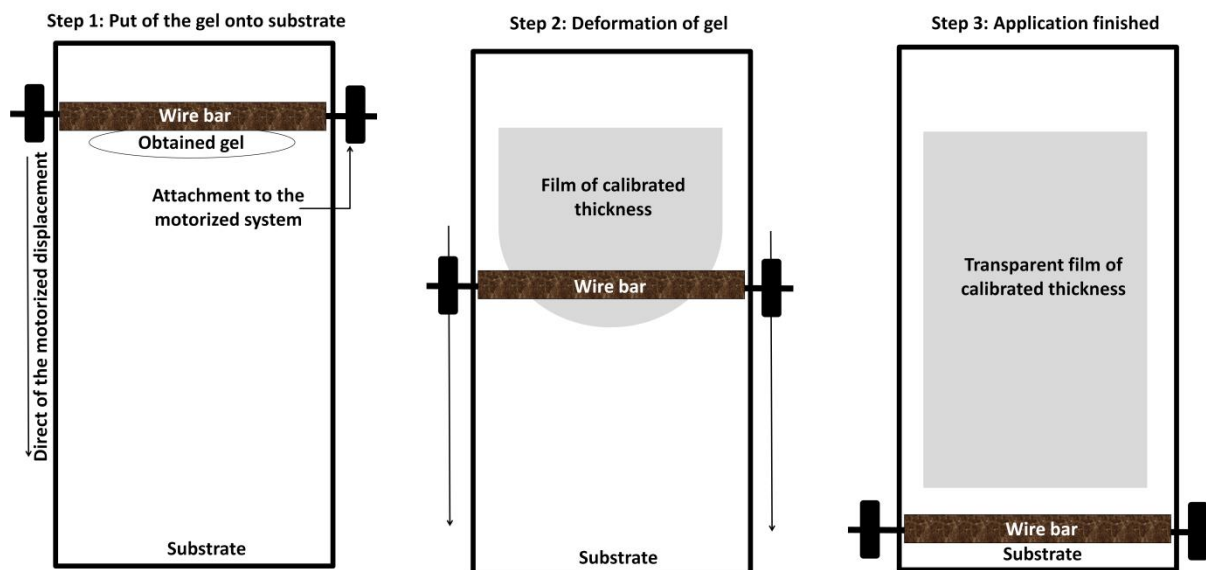

**Fig. S1.** Schematic demonstration of automatic film applicator set-up.

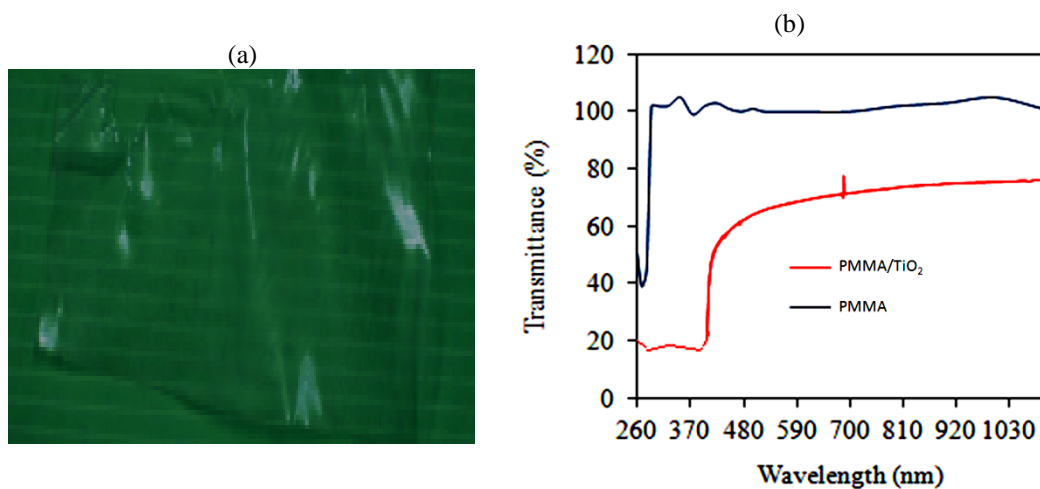

**Fig. S2.** (a) The photograph of PMMA/TiO<sub>2</sub> nanocomposite and (b) UV-Vis transmittance of the transparent PMMA and PMMA/TiO<sub>2</sub> nanocomposite.

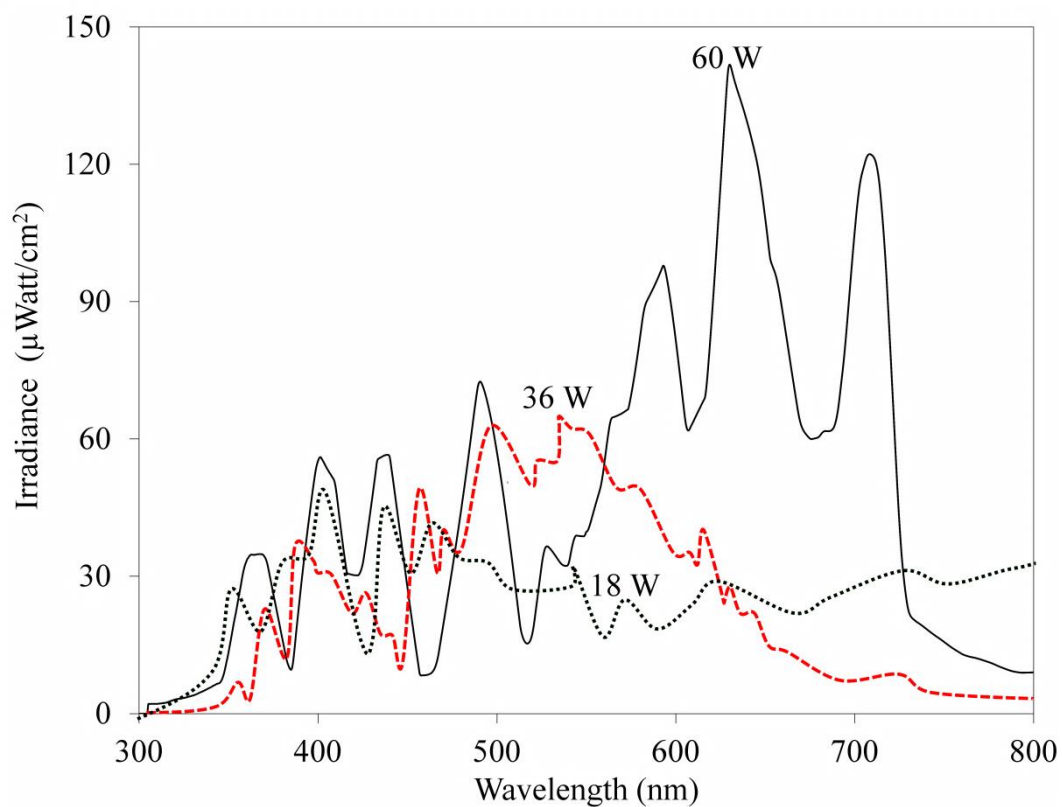

**Fig. S3.** Emission spectrum of the various light source used in photocatalytic reduction setup.
